# Supplementary material
Source: PubMed Central journal article supplement (PMC5167360)
Supplement: NIHMS830159-supplement-Supplementary_Materials.pdf [file NIHMS830159-supplement-Supplementary_Materials.pdf]

## **Supplementary Materials and Methods**

### **Proliferation assay**

pLNCX-empty vector or pLNCX-N4ICD transduced cells were seeded into 96 well plates at a concentration of  $5 \times 10^3$  cells per well. Cell proliferation was measured by addition of 10 $\mu$ L of a 12mM MTT stock solution (Invitrogen Life Technologies) to 100  $\mu$ L of RPMI media without phenol red (Gibco, Life Technologies). After 4 hours of incubation at 37°C, 100 $\mu$ L of a 0.01 M HCl 10% SDS solution were added and again incubated for 4 hours at 37°C. The assay was incubated at 37°C for 10 minutes and the absorbance was measured at 570 nm.

### **Adhesion assay**

Cells were stained with 5 $\mu$ M Vybrant® Dil cell-labeling solution (Molecular Probes, Invitrogen) for 30 minutes at 37°C, washed with PBS and harvested using trypsin (Life Technologies). Cells were resuspended in DMEM medium containing 2% FCS, 2% L-Glutamine. Monolayers E-cadherin expressing HaCaT cells were incubated with 30.000 cells per well in 6-well-plates for 1 hour at 37°C. Non-adherent cells were removed by washing with PBS. Numbers of adherent cells were determined in triplicate wells using fluorescence microscopy.

### **Chromatin immunoprecipitation (ChIP) assay**

ChIP was performed using SimpleChIP Enzymatic Chromatin IP Kit (Cell Signaling), following the manufacturer's protocol. Two different anti-CSL antibodies (D20 and H-50 see Supplementary Table 2) were used for chromatin precipitation while anti-Histone H3 and rabbit IgG antibody served as positive or negative control, respectively. All antibodies were diluted 1:50. Following the DNA purification isolated fragments were amplified using promoter specific primers (Supplementary Table 3) and visualized using agarose gel electrophoresis.

## Supplementary Figure Legends

### Supplementary Figure 1: Phenotypic changes induced by overexpression of N4ICD

**A**, Morphology of N4ICD transduced cells. Expression of N4ICD was confirmed by immunoblotting.  $\beta$ -Actin was used as a loading control. **B**, Migration of N4ICD transduced 451Lu. **C**, Invasion of N4ICD transduced 451Lu determined. **D**, Adhesion to keratinocytes of N4ICD transduced 451Lu determined by incubating cells with a monolayer of HaCaT. **E**, Proliferation of N4ICD transduced 451Lu, WM9 and WM164 determined by MTT assay. The error bars represent standard deviations from the mean. n.s. not significant, \*  $P \leq 0.05$ , \*\*  $P \leq 0.01$ , \*\*\*  $P \leq 0.001$

### Supplementary Figure 2: Correlation of Notch4 and EMT markers

**A**, Immunoblots of whole cell lysates of 451Lu transduced with pLNCX-empty vector or pLNCX-N4ICD constructs.  $\beta$ -Actin was used as loading control. **B**, Immunohistochemistry of primary melanomas (two upper panels) and a subcutaneous metastasis for E-cadherin (middle panel) and Notch4 (right panel). Left panel: unspecific secondary IgG antibody (x10; inserts x20).

### Supplementary Figure 3: CSL directly binds Snail2 and Twist1 promoter regions

**A**, Immunoblots (left panel) or mRNA levels (right panel) of WM35 transfected with specific siRNA targeting CSL or scrambled control RNA (scrRNA). **B**, Snail2 promoter region from -1500 bp to +500 bp and the Twist1 promoter region from -2000 bp to +500 bp relative to the transcriptional start site (TSS). Identified and randomly chosen potential CSL binding sites, the amplified ChIP fragments as well as the translational start (ATG) are indicated. **C**, EMSA of WM164 incubated with 20 nt fragments of Cy3 labeled wild type (wt-Cy3), Cy3 labeled wt together with 20 fold excess of unlabeled wt (wt-C3+20xwt unlabeled) or Cy3 labeled mutated (mut-Cy3) synthetic oligonucleotides and probed for CSL. **D**, ChIP assay was performed with WM9 and WM164 using antibodies targeting CSL (D20 and H-50), Histone

H3 and rabbit IgG for precipitation. Promoter specific primers amplified fragments of 229 bp (Snail2) and 316 bp (Twist1).

**Supplementary Figure 4: Notch4 and Hey1/2 suppress Snail2 and Twist1 gene expression**

**A**, Immunoblots (left panel) and mRNA (right panel) levels of Snail2 and Twist1 of WM9 and WM164 transfected with siRNA targeting Notch4 (siNotch4). **B**, Immunoblots (left panel) and mRNA (right panel) levels of Snail2 and Twist1 of WM35 transfected with siRNA targeting Notch4. **C**, Immunoblots of Hey1 and Hey2 of WM9 and WM164 transfected with siRNA targeting Notch4. **D**, Immunoblots (left panel) and mRNA (right panel) levels of Snail2 and Twist1 in WM35 transfected with siRNA targeting Hey1. **E**, Immunoblots (left panel) and mRNA (right panel) levels of Snail2 and Twist1 in WM35 transfected with siRNA targeting Hey2. The error bars represent standard deviations from the mean. Statistical significance of results was calculated using an unpaired t-test. n.s. not significant, \*  $P \leq 0.05$ , \*\*  $P \leq 0.01$ , \*\*\*  $P \leq 0.001$

**Supplementary Figure 5: Hey1/2 directly regulate Snail2 and Twist1 expression**

**A**, Immunoblots of WM9 transduced with pLNCX-empty vector, pLNCX-N4ICD or pLNCX-N4ICD and siRNA targeting Hey1 (siHey1), Hey2 (siHey2) or scrambled control RNA (scRNA) **B**, Snail2 promoter region from -1500 bp to +500 bp and the Twist1 promoter region from -2000 bp to +500 bp relative to the transcriptional start site (TSS). Identified and randomly chosen potential E-Boxes and the translational start (ATG) are indicated.

Supplementary Figures

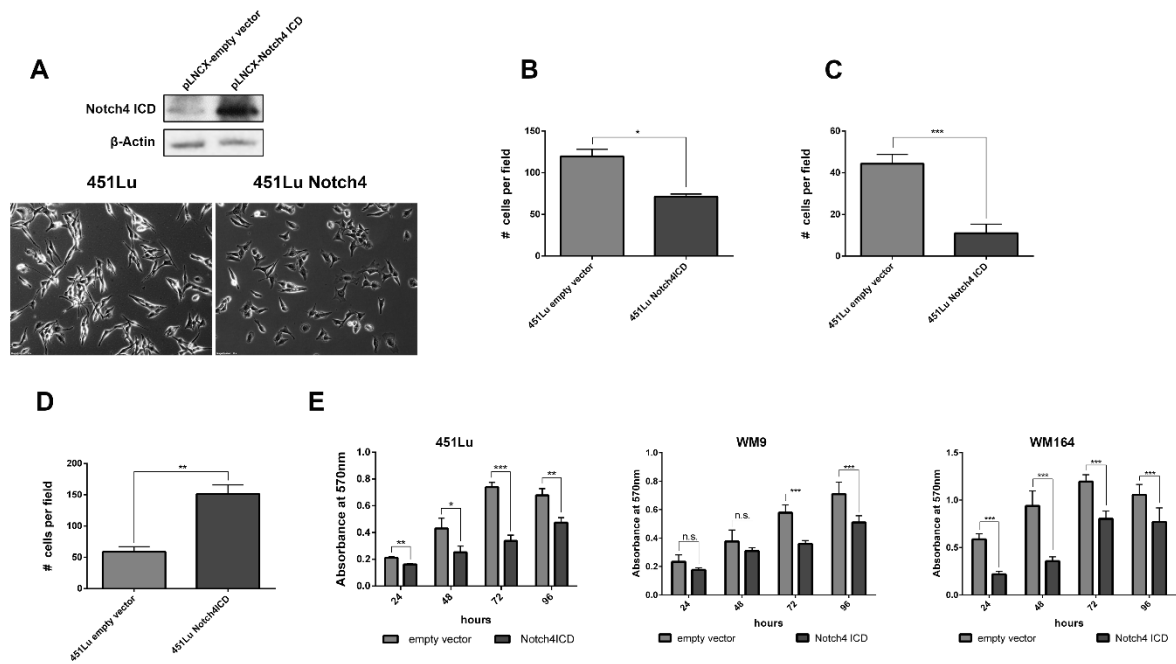

Supplementary Figure 1

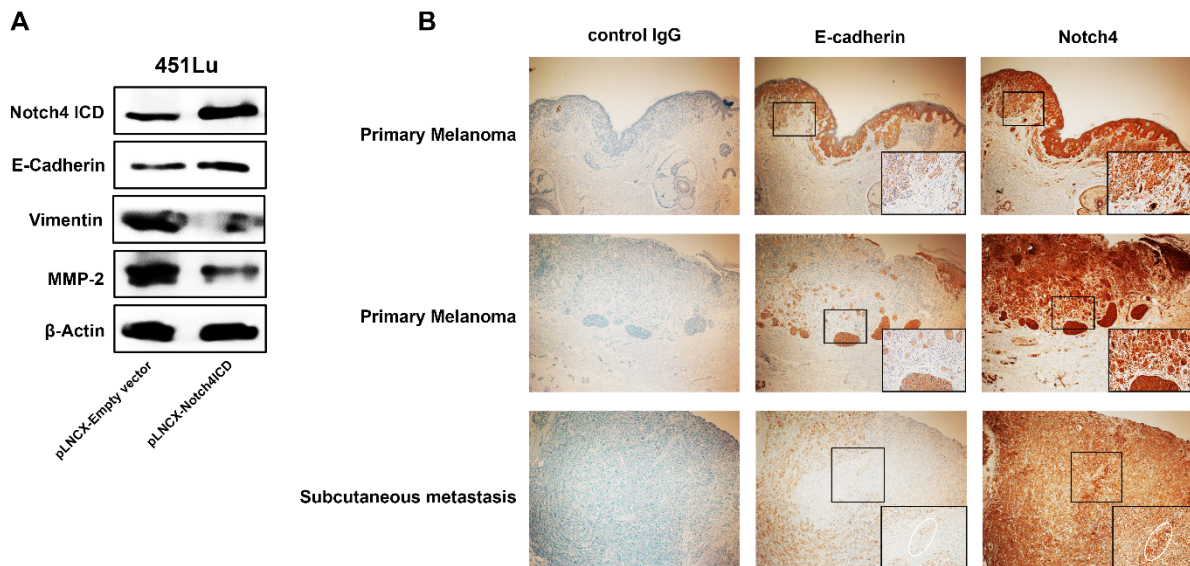

Supplementary Figure 2

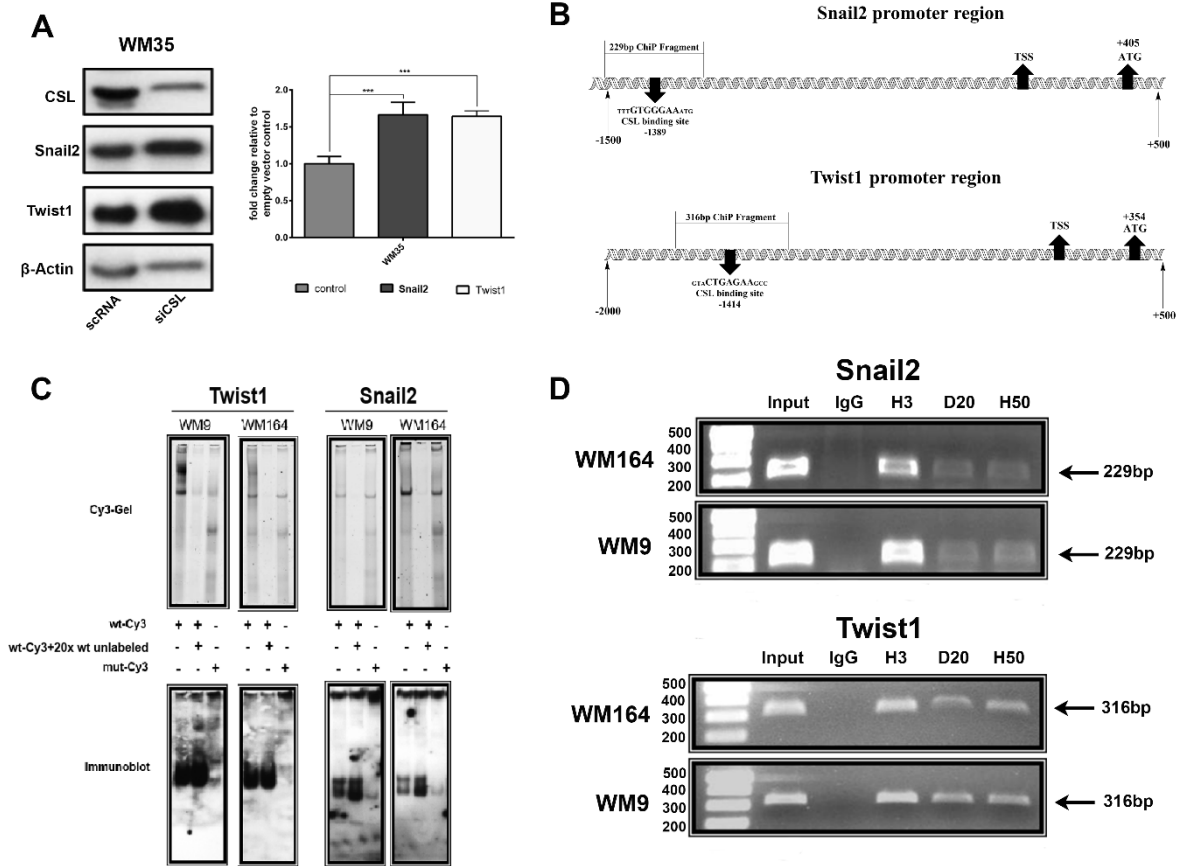

Supplementary Figure 3

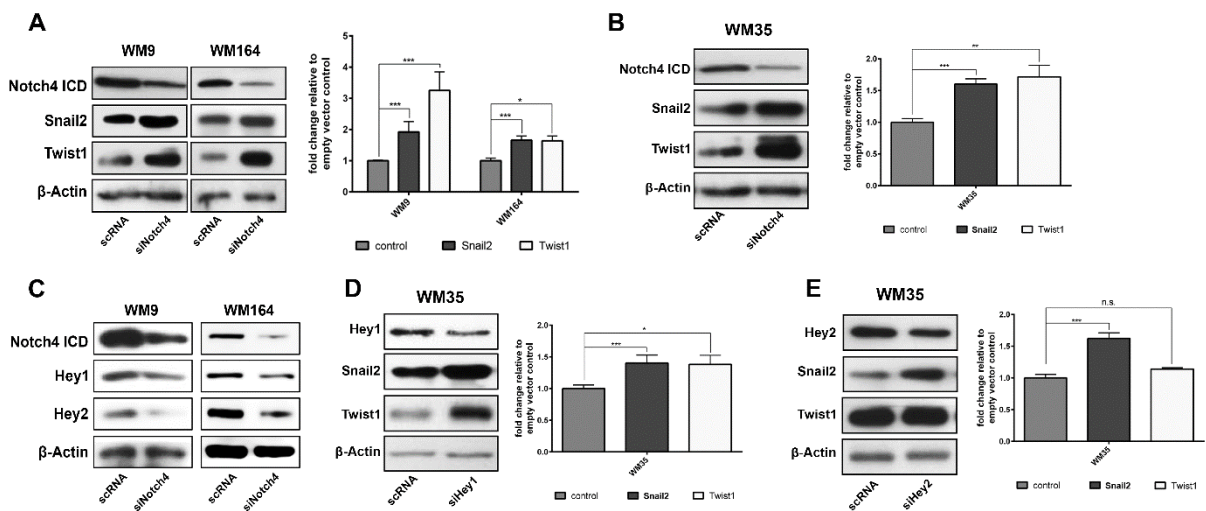

Supplementary Figure 4

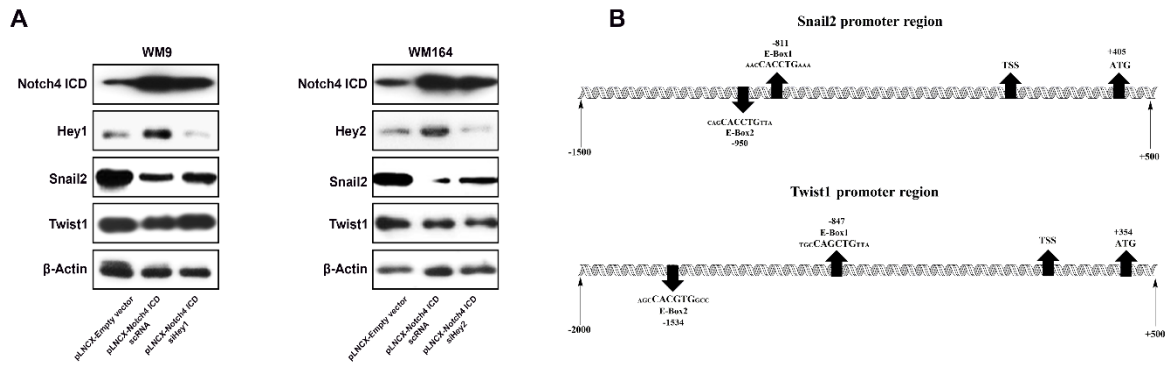

Supplementary Figure 5

Supplementary Tables

Supplementary Table 1: Plasmids and siRNAs

| Name                                     | Vendor                                                                                                                                                                                      |
|------------------------------------------|---------------------------------------------------------------------------------------------------------------------------------------------------------------------------------------------|
| SMARTpool: ON-TARGETplus HEY1 siRNA      | Thermo Scientific/Dharmacon                                                                                                                                                                 |
| SMARTpool: ON-TARGETplus HEY2 siRNA      | Thermo Scientific/Dharmacon                                                                                                                                                                 |
| SMARTpool: ON-TARGETplus NOTCH4 siRNA    | Thermo Scientific/Dharmacon                                                                                                                                                                 |
| SMARTpool: ON-TARGETplus RBPJ siRNA      | Thermo Scientific/Dharmacon                                                                                                                                                                 |
| Scrambled siRNA (scRNA)                  | QIAGEN                                                                                                                                                                                      |
| pCMV6-Hey1 (NM_012258 Human cDNA Clone)  | OriGene Technologies                                                                                                                                                                        |
| pCMV6-Hey2 (NM_012259) Human cDNA Clone) | OriGene Technologies                                                                                                                                                                        |
| pCMV6-XL5                                | OriGene Technologies                                                                                                                                                                        |
| pLNCX-empty vector                       | Kindly provided by Dr. Aly Karsa (Departments of Experimental Medicine, Pathology and Laboratory Medicine, University of British Columbia and British Columbia Cancer Agency, Department of |

|                                                                           |                                                                                                                                                                                                                                                                                             |
|---------------------------------------------------------------------------|---------------------------------------------------------------------------------------------------------------------------------------------------------------------------------------------------------------------------------------------------------------------------------------------|
|                                                                           | Medical Biophysics, British Columbia Cancer Agency, Vancouver, British Columbia V5Z 1L3, Canada)                                                                                                                                                                                            |
| pLNCX-N4ICD (Notch4ICD, amino acids 1476 to 2003, C-terminally HA-tagged) | Kindly provided by Dr. Aly Karsa (Departments of Experimental Medicine, Pathology and Laboratory Medicine, University of British Columbia and British Columbia Cancer Agency, Department of Medical Biophysics, British Columbia Cancer Agency, Vancouver, British Columbia V5Z 1L3, Canada |
| pVSV-G                                                                    | Clontech                                                                                                                                                                                                                                                                                    |
| pGL3-basic                                                                | Promega                                                                                                                                                                                                                                                                                     |
| pSV- $\beta$ -Galactosidase Control Vector                                | Promega                                                                                                                                                                                                                                                                                     |
| pGL3-PromSnail2 (sequence details see Supplementary Table 7)              | Genscript                                                                                                                                                                                                                                                                                   |
| pGL3PromSnail2Mut (sequence details see Supplementary Table 7)            | Genscript                                                                                                                                                                                                                                                                                   |
| pGL3-PromTwist1 (sequence details see Supplementary Table 7)              | Genscript                                                                                                                                                                                                                                                                                   |
| pGL3PromTwist1Mut (sequence details see Supplementary Table 7)            | Genscript                                                                                                                                                                                                                                                                                   |

**Supplementary Table 2: Antibodies**

| Primary antibody |                |          | HRP conjugated secondary antibody |            |                |
|------------------|----------------|----------|-----------------------------------|------------|----------------|
| Target Protein   | Company        | Dilution | Target                            | Company    | Dilution       |
| Notch4           | Cell Signaling | 1:2000   | Rabbit anti mouse                 | Dako       | 1:1000         |
| Notch4           | Abcam          | 1:150    | Mouse and rabbit                  | Ventana    | <50 $\mu$ g/ml |
| CSL              | Gentex         | 1:1000   | Goat anti rabbit                  | Santa Cruz | 1:4000         |
| CSL (D20)        | Santa Cruz     | 1:50     |                                   |            |                |
| CSL (H50)        | Santa Cruz     | 1:50     |                                   |            |                |
| E-cadherin       | BD             | 1:500    | Rabbit anti mouse                 | Dako       | 1:1000         |

|            |                |         |                   |            |          |
|------------|----------------|---------|-------------------|------------|----------|
|            | Bioscience     |         |                   |            |          |
| E-cadherin | Dako           | 1:100   | Mouse and rabbit  | Ventana    | <50µg/ml |
| Vimentin   | Cell Signaling | 1:1000  | Goat anti rabbit  | Santa Cruz | 1:4000   |
| MMP-2      | Cell Signaling | 1:1000  | Goat anti rabbit  | Santa Cruz | 1:4000   |
| Snail2     | Santa Cruz     | 1:200   | Donkey anti goat  | Santa Cruz | 1:4000   |
| Twist1     | Abcam          | 1:1000  | Rabbit anti mouse | Dako       | 1:1000   |
| β-Actin    | Sigma          | 1:10000 | Goat anti rabbit  | Santa Cruz | 1:4000   |
| Hey1       | Abcam          | 1:1000  | Rabbit anti mouse | Dako       | 1:1000   |
| Hey1       | Abcam          | 1:1000  | Goat anti rabbit  | Santa Cruz | 1:4000   |
| Hey2       | Abcam          | 1:1000  | Goat anti rabbit  | Santa Cruz | 1:4000   |

**Supplementary Table 3: Primers**

| <b>Name</b>                                                                                | <b>Vendor</b> | <b>Application</b> |
|--------------------------------------------------------------------------------------------|---------------|--------------------|
| Snail2 (QT00044128)                                                                        | QIAGEN        | qPCR               |
| Twist1 (QT00011956)                                                                        | QIAGEN        | qPCR               |
| E-cadherin (QT00080143)                                                                    | QIAGEN        | qPCR               |
| Vimentin (QT00095795)                                                                      | QIAGEN        | qPCR               |
| Actin Fw: 5'CCACACTGTGCCCATCTACG3' [1]<br>Actin Rev:<br>5'AGGATCTTCATGAGGTAGTCAGTCAG3' [1] | Ingenetix     | qPCR               |
| Hey1 Fw: 5'AGCCGAGATCCTGCAGATGA3' [2]<br>Hey1 Rev: 5'GCCGTATGCAGCATTTTCAG3' [2]            | Ingenetix     | qPCR               |
| Hey2 Fw: 5'AGATGCTTCAGGCAACAGGG3' [2]<br>Hey2 Rev: 5'CAAGAGCGTGTGCGTCAAAG3' [2]            | Ingenetix     | qPCR               |
| MMP2 Fw: 5'ATGCCGCCTTTAACTGGAG3' [3]<br>MMP2 Rev: 5'GGAAAGCCAGGATCCATTTT3' [3]             | Ingenetix     | qPCR               |
| Twist1 Fw 5'CCTGAGGTTTCCAAGACCAA3'<br>Twist1 Rev 5'CGTTTCAGGTCCATCCCTTA3'                  | Ingenetix     | ChIP               |



|                                                                                     |           |      |
|-------------------------------------------------------------------------------------|-----------|------|
| Snail2 Fw 5'AGACTGTGTAGAGTGAAACAAGG3'<br>Snail2 Rev<br>5'TCTCCACACACAAACTGGAACCTG3' | Ingenetix | ChIP |
|-------------------------------------------------------------------------------------|-----------|------|

Supplementary Table 4: EMSA sequences

| Snail2 E-Box1                       |                                     |
|-------------------------------------|-------------------------------------|
| WT                                  | Mut                                 |
| 5'AATAAAC <b>CACCTG</b> AAAGTAT 3'  | 5'AATAAAC <b>ATCCTA</b> AAAGTAT 3'  |
| Snail2 E-Box2                       |                                     |
| WT                                  | Mut                                 |
| 5'CCTCCAG <b>CACCTG</b> TTAGAAA 3'  | 5'CCTCCAG <b>ATCCTA</b> TTAGAAA 3'  |
| Twist1 E-Box1                       |                                     |
| WT                                  | Mut                                 |
| 5'GCATTGC <b>CAGCTG</b> TTAGGGC 3'  | 5'GCATTGC <b>ATGCTA</b> TTAGGGC 3'  |
| Twist1 E-Box2                       |                                     |
| WT                                  | Mut                                 |
| 5' GAACAGC <b>CACGTG</b> GCCTGCC 3' | 5' GAACAGC <b>ATCGTA</b> GCCTGCC 3' |
| Snail2 CSL                          |                                     |
| WT                                  | Mut                                 |
| 5' TGTTTT <b>GTGGGAA</b> ATGGAGT 3' | 5' TGTTTT <b>GTGCTGC</b> ATGGAGT 3' |
| Twist1 CSL                          |                                     |
| WT                                  | Mut                                 |
| 5' TCCGT <b>CTGAGAA</b> GCCCATG 3'  | 5' TCCGT <b>CAGACTCCT</b> CCCATG 3' |

**Supplementary Table 5: Sequences of Luciferase fragments**

| <b>Twist1 Luciferase fragment</b>                                                                                                                                                                                                                                                                                                                                                                                                                                                                                                                                                                                                                                                                                                                                                                                                                                                                                                                                                                                                                                                                                                                                                                                                                                                                                                                                                                                                                                                                                                                                                                                                                                                                                                                                                                                                                                                                                                                                                                                                                                                                                                                                                                                            |
|------------------------------------------------------------------------------------------------------------------------------------------------------------------------------------------------------------------------------------------------------------------------------------------------------------------------------------------------------------------------------------------------------------------------------------------------------------------------------------------------------------------------------------------------------------------------------------------------------------------------------------------------------------------------------------------------------------------------------------------------------------------------------------------------------------------------------------------------------------------------------------------------------------------------------------------------------------------------------------------------------------------------------------------------------------------------------------------------------------------------------------------------------------------------------------------------------------------------------------------------------------------------------------------------------------------------------------------------------------------------------------------------------------------------------------------------------------------------------------------------------------------------------------------------------------------------------------------------------------------------------------------------------------------------------------------------------------------------------------------------------------------------------------------------------------------------------------------------------------------------------------------------------------------------------------------------------------------------------------------------------------------------------------------------------------------------------------------------------------------------------------------------------------------------------------------------------------------------------|
| <p>AGTCTTGTTTACACCTCGCTGGAGAAATAAACTCGCCCTCACTTCTCCAAAAAGCTGAACCCTT<br/>           CAGTCGGCCCAAGCAGCTCCACACCCTGAGGTTTTCAAGACCAAAGCTGCGAGTCTCAGCAGGG<br/>           AACAGC<b>CACGTG</b>GCCTGCCTGCGCCTCGCCTGGGCTCTTGCCTTCAGCTTGAGATATCTGCAGC<br/>           CGCGAACCTTGCTCCAGCCAGAAAGGGGCGCTTTGCTCAATTAATTGTTCCCGCCGGCGAGTC<br/>           CGTACTGAGAAGCCCATGAGCGGACCTTATGTGCAGGGTACTCCAGCGCGGTGCACAAAACCTCG<br/>           TCGCCCCAAACGCTGCCCCACCCCAAACTGTGTACTGACTCCAGCTTTTTACTTTGCCATGT<br/>           AAGGGATGGACCTGAAACGGTTATTTTACCTCAATTCATTTCAAAAAGGAAACAAGTATGGCATTG<br/>           CAAAAGATGGGCTTCTTATCCAAGGCGACTTCCTTTCTGGTTCACCAACTTTGCTGCTTCCAGTTT<br/>           GCCAGGATCTACATTAACACCCTCTTTGGGGCTCTTCGTTTTAACTTACAGACAGAAATGCTTAAA<br/>           ATGTTAGCGTATCCAAGCATTGGGAATTGGGGCTCACGAAGCCTAATTGTCCACTGGATGCCCTA<br/>           GATAGTGGGGGCTGGGGCGGGGGGGTCTCAGAGCGGGCAGCCCTATGTCTAGGCGCTATC<br/>           AAATCCCACTTCACTCTCTTACAAGCTGGCCTTCAAGGTCACAATGCGGAGCCTAATTTGGGG<br/>           GTGGGGATGAAATGGCCACAGGGTCTCTCCCTTGGGTTGGCATTGC<b>CAGCTG</b>TTAGGGCCGCAG<br/>           CAAAGGCGCTGCGCTGCCCCCTCTGGCTCTGCTGCCTTTCCCATGGACTGGGTTTCTTCCAC<br/>           CGAAGAGTGAACCTTCTGCCTCTTTCGAGCACCTTCGAGGCGTAGTCCTTTGGATGTTGGGGAG<br/>           CGTCAGACTGGGTCGTTGTAGAGGGGAAAGGAGGGGCCAGAAGGGCGAGAGAGCAGGCCGGG<br/>           ACGCAAATCCTCAGCCCCGCGGCGCGGCCACGTCTTCAGAAACGCCAGGACCTCCGGGCTG<br/>           GGCCGCCGCGGTTTGGCCTTTGGAACCTCAAGGGGTTCTGTACCTGACCATTGGGTGGGCTCC<br/>           GCGGTTGACACTTTTCTTGGCATGCCCCCCACCCCGCGCCACACCACCCCCAGCCCCAGCA<br/>           ATCCCAAATCGGCCCCACGGACCTAGAGGGCTCTTGGGCGAGATGAGACATCACCCACTGTGTA<br/>           GAAGCTGTTGCCATTGCTGCTGTACAGCCACTCCGGATGGGGCTGCCACCGCGGCCAGGACA<br/>           GTCTCCTCCGACCGCTTCTGGGCTGCGCTAGGGTTCGGGGGCGCTGCCCGCACGCTCCGGCG<br/>           GGGAAGGAAATCGCCCCGCGCCCGCCGGAGGAAGGCGACGGGGAGGGAAGGGGGAGGGCGG<br/>           CTAGGAGGCGGGTGGAGGGGCGGCCGCGCCCGGGCCAGGTCGTTTTTGAATGGTTTGGGAGGA<br/>           CGAATTGTTAGACCCCGAGGAAGGGAGGTGGGACGGGGGAGGGGGACTGGAAAGCGGAAACTT<br/>           TCCTATAAACTTCGAAAAGTCCCTCCTCCTCACGTCAGGCCAATGACACTGCTGCCCCAACT<br/>           TTCCGCCTGCACGGAGGTATAAGAGCCTCCAAGTCTGCAGCTCTCGCCAACTCCAGACACC</p> |

| <b>Mutated Twist1 Luciferase fragment</b>                                                                                                                                                                                                                                                                                                                                                                                                                                                                                                                                                                                                                                                                                                                                                                                                                                                                                                                                                                                                                                                                                                                                                                                                                                                                                                                                                                                                                                                                                                                                                                                                                                                                                                                                                                                                                                                                                                                                          |
|------------------------------------------------------------------------------------------------------------------------------------------------------------------------------------------------------------------------------------------------------------------------------------------------------------------------------------------------------------------------------------------------------------------------------------------------------------------------------------------------------------------------------------------------------------------------------------------------------------------------------------------------------------------------------------------------------------------------------------------------------------------------------------------------------------------------------------------------------------------------------------------------------------------------------------------------------------------------------------------------------------------------------------------------------------------------------------------------------------------------------------------------------------------------------------------------------------------------------------------------------------------------------------------------------------------------------------------------------------------------------------------------------------------------------------------------------------------------------------------------------------------------------------------------------------------------------------------------------------------------------------------------------------------------------------------------------------------------------------------------------------------------------------------------------------------------------------------------------------------------------------------------------------------------------------------------------------------------------------|
| <p>AGTCTTGTTTACACCTCGCTGGAGAAATAAACTCGCCCTCACTTCTCCAAAAAGCTGAACCCTT<br/>           CAGTCGGCCCAAGCAGCTCCACACCCTGAGGTTTTCAAGACCAAAGCTGCGAGTCTCAGCAGGG<br/>           AACAGC<b>ATCGTA</b>GCCTGCCTGCGCCTCGCCTGGGCTCTTGCCTTCAGCTTGAGATATCTGCAGC<br/>           CGCGAACCTTGCTCCAGCCAGAAAGGGGCGCTTTGCTCAATTAATTGTTCCCGCCGGCGAGTC<br/>           CGTACTGAGAAGCCCATGAGCGGACCTTATGTGCAGGGTACTCCAGCGCGGTGCACAAAACCTCG<br/>           TCGCCCCAAACGCTGCCCCACCCCAAACTGTGTACTGACTCCAGCTTTTTACTTTGCCATGT<br/>           AAGGGATGGACCTGAAACGGTTATTTTACCTCAATTCATTTCAAAAAGGAAACAAGTATGGCATTG<br/>           CAAAAGATGGGCTTCTTATCCAAGGCGACTTCCTTTCTGGTTCACCAACTTTGCTGCTTCCAGTTT<br/>           GCCAGGATCTACATTAACACCCTCTTTGGGGCTCTTCGTTTTAACTTACAGACAGAAATGCTTAAA<br/>           ATGTTAGCGTATCCAAGCATTGGGAATTGGGGCTCACGAAGCCTAATTGTCCACTGGATGCCCTA<br/>           GATAGTGGGGGCTGGGGCGGGGGGGTCTCAGAGCGGGCAGCCCTATGTCTAGGCGCTATC<br/>           AAATCCCACTTCACTCTCTTACAAGCTGGCCTTCAAGGTCACAATGCGGAGCCTAATTTGGGG<br/>           GTGGGGATGAAATGGCCACAGGGTCTCTCCCTTGGGTTGGCATTGC<b>ATGCTA</b>TTAGGGCCGCAG<br/>           CAAAGGCGCTGCGCTGCCCCCTCTGGCTCTGCTGCCTTTCCCATGGACTGGGTTTCTTCCAC<br/>           CGAAGAGTGAACCTTCTGCCTCTTTCGAGCACCTTCGAGGCGTAGTCCTTTGGATGTTGGGGAG<br/>           CGTCAGACTGGGTCGTTGTAGAGGGGAAAGGAGGGGCCAGAAGGGCGAGAGAGCAGGCCGGG<br/>           ACGCAAATCCTCAGCCCCGCGGCGCGGCCACGTCTTCAGAAACGCCAGGACCTCCGGGCTG<br/>           GGCCGCCGCGGTTTGGCCTTTGGAACCTCAAGGGGTTCTGTACCTGACCATTGGGTGGGCTCC<br/>           GCGGTTGACACTTTTCTTGGCATGCCCCCCACCCCGCGCCACACCACCCCCAGCCCCAGCA<br/>           ATCCCAAATCGGCCCCACGGACCTAGAGGGCTCTTGGGCGAGATGAGACATCACCCACTGTGTA<br/>           GAAGCTGTTGCCATTGCTGCTGTACAGCCACTCCGGATGGGGCTGCCACCGCGGCCAGGACA<br/>           GTCTCCTCCGACCGCTTCTGGGCTGCGCTAGGGTTCGGGGGCGCTGCCCGCACGCTCCGGCG<br/>           GGGAAGGAAATCGCCCCGCGCCCGCCGGAGGAAGGCGACGGGGAGGGAAGGGGGAGGGCGG<br/>           CTAGGAGGCGGGTGGAGGGGCGGCCGCGCCCGGGCCAGGTCGTTTTTGAATGGTTTGGGAGGA</p> |

CGAATTGTTAGACCCCGAGGAAGGGAGGTGGGACGGGGGAGGGGACTGGAAAGCGGAACTT  
TCCTATAAACTTCGAAAAGTCCCTCCTCCTCACGTCAGGCCAATGACACTGCTGCCCCAACT  
TTCCGCTGCACGGAGGTATAAGAGCCTCCAAGTCTGCAGCTCTCGCCAACTCCCAGACACC

### Snail2 Luciferase fragment

TGTAACAAAAATGTGTGTTTTGTGGGAAATGGAGTGAAAAGCAAGGAGGACTCCTGCTCTCATAA  
ACC**CAGGTG**CCTACATCCGAACAAACCCTCACATAGAGTAGCAAGCTTAGAAAAGTGCCTCTGGC  
TTTTACTCCAGGTTCCAGTTTGTGTGTGGAGAAATCGAATATGTATTCATATTTTCTCTCTCCTGC  
AAGTACAGTTCCATTAGCATAAGGATTCCTTTGAATTATTTTCTCTGTTTGACATTTAAATTAGTGA  
CTGTTGGAAGAAATAAGAATAATCATTGAAATTAGCTTAGGAAATCTGTGAGTGCCCCACCTCACC  
CTCCAAACACACATACTCTTGTGTTTTCTCATTCCAAGATTAAGAAGTTATGCAACCTGACAATGC  
ACTTTTTCTCTGACAAGTCTTGACATCACCACTGTTATTTTCTTTTTCACTTTTTTCTCCAG**CACCT**  
**G**TTAGAAACAAGAGTAGGGTGATCTTCATGTGAATTTGTTCTTTCTTATTCTTTTAGCAAAAGATA  
GGGATAAAAGTCTGCAATGGACAGAGATGCTTTAAAATATGCTTGAAATTTTATATTTAAAATAAAC  
**CACCTG**AAAGTATTTTATAGATTGAAGACCATACACAAAATAAAGGTGTTTTTGCAGTTACTAGACT  
GGGTTCTTAAAACTTTAAATCAATCTATATTCATAATAATATCCTTCAATTTCTTTTTTAGCATTATACA  
GGAACTGGTAGATACTGAGATGGATTTTAAATGGCTTTATACTGATGAAAATAGCACCACATAAAA  
GCAGGGGAATATTAGAAATAAAAAATAATTGTCTCTAAAGACCCATACAACCCTTTTTCCCATAAAAA  
AAAAGATGCACTGTAATACATGAAAAGATAAGATCTCTTGCAAAAGTGTGAGAGAATGTCCGGTG  
GTTCCAAATGACAGTTACCTCTTGCCCCCTTCTCTGCCAGAGTTCCTTTTTATCTTTGCAATCTTC  
CAGTTCCTCCGATCAGCCTGCCTTTAGAGGGCTACAAAGCATTTCCTTTCAAGCCACCATAGCTAAC  
ACGGTGACATGAGTACTTAATTTGCACGCGGCCGCGCTGCCCTGGCTTCGCGGAAGCCCTGAG  
TAGCGCAGCGCCCTCGCCGCACGCAAGGCTGCAGTCCCGCTCCAGGCCAGAGTCCCAGGAGAG  
CGTCTCCGCGCTCACAGGCGCCTTTGTCTTCCCGCTTCCCCCTTCTTTTTCAAAGCCAAGAG  
GTAATTATTTGGTCTTTGTGCAAGGCAAACCTCTCCAGATGCCACTTCAAATATAGGCTCTCATT  
AACACCAGAGGCTGGCCTGGTGTGGTGCAGGGCGGCCCTTCTTCTCTGGCGGACACTGTGT  
CCCCGCGCGCTGGCGCTGCACCACATCTGGAAGCCAGGCGGGCAGGGCAGAGACCCCGGCTC  
CTGCGCCCTCCTAGCTCCAGAGAGCGTGGATCGCGGGCGGGGCTCACCGAGCGAGGTTACC  
TCTCTGAAAATACTTAAACACTTTTTTCTCTCCACTGAAATCTCAAAAAACAGCCCCATTTTAA  
CCAGAATAATTTAGTCTGACAACAGATTTCTCTCTGTTCA**CAGCTG**TCCCAGAGGGAGGAGCTG  
AAACTGAAACCTCT**CAGCTG**TGATTGGATCTTTCTTGCAAAAGAGAGGAAAAAAAACCTCCCAG  
CCAAAACGGGCTCAGTTCGTAAAGGAGCCGGGTGACTTTCAGAGGCGCCGCGCCGTCCGTCTGC  
CG**CACCTG**AGCACGGCCCTGCCGAGCCTGGCCCGCCGCGATGCTGTAGGGACCGCCGTGT  
CTCCCCGCGGACCGTT

### Mutated Snail2 luciferase Fragment

TGTAACAAAAATGTGTGTTTTGTGGGAAATGGAGTGAAAAGCAAGGAGGACTCCTGCTCTCATAA  
ACC**ATGGTA**CCTACATCCGAACAAACCCTCACATAGAGTAGCAAGCTTAGAAAAGTGCCTCTGGC  
TTTTACTCCAGGTTCCAGTTTGTGTGTGGAGAAATCGAATATGTATTCATATTTTCTCTCTCCTGC  
AAGTACAGTTCCATTAGCATAAGGATTCCTTTGAATTATTTTCTCTGTTTGACATTTAAATTAGTGA  
CTGTTGGAAGAAATAAGAATAATCATTGAAATTAGCTTAGGAAATCTGTGAGTGCCCCACCTCACC  
CTCCAAACACACATACTCTTGTGTTTTCTCATTCCAAGATTAAGAAGTTATGCAACCTGACAATGC  
ACTTTTTCTCTGACAAGTCTTGACATCACCACTGTTATTTTCTTTTTCACTTTTTTCTCCAG**ATCCTA**  
TTAGAAACAAGAGTAGGGTGATCTTCATGTGAATTTGTTCTTTCTTATTCTTTTAGCAAAAGATAG  
GGATAAAAGTCTGCAATGGACAGAGATGCTTTAAAATATGCTTGAAATTTTATATTTAAAATAAAC**A**  
**TCCTA**AAAGTATTTTATAGATTGAAGACCATACACAAAATAAAGGTGTTTTTGCAGTTACTAGACTGG  
GTTCTTAAAACTTTAAATCAATCTATATTCATAATAATATCCTTCAATTTCTTTTTTAGCATTATACAGG  
AAACTGGTAGATACTGAGATGGATTTTAAATGGCTTTATACTGATGAAAATAGCACCACATAAAAAAGC  
AGGGGAATATTAGAAATAAAAAATAATTGTCTCTAAAGACCCATACAACCCTTTTTCCCATAAAAAAA  
AAGTAGCACTGTAATACATGAAAAGATAAAGATCTCTTGCAAAAGTGTGAGAGAATGTCCGGTGG  
TTCCAAATGACAGTTACCTCTTGCCCCCTTCTCTGCCAGAGTTCCTTTTTATCTTTGCAATCTTCC  
AGTTCTTCCGATCAGCCTGCCTTTAGAGGGCTACAAAGCATTTCCTTTCAAGCCACCATAGCTAAC  
CGGTGACATGAGTACTTAATTTGCACGCGGCCGCGCTGCCCTGGCTTCGCGGAAGCCCTGAGT  
AGCGCAGCGCCCTCGCCGCACGCAAGGCTGCAGTCCCGCTCCAGGCCAGAGTCCCAGGAGAG  
CGTCTCCGCGCTCACAGGCGCCTTTGTCTTCCCGCTTCCCCCTTCTTTTTCAAAGCCAAGAG

GTAATTATTTGGTCTTTGTGCAAGGCAAACCTCTCCAGATGCCACTTCCAAATATAGGCTCTCATT  
AACACCAGAGGCTGGCCTGGTGTGGTGCAGGGCGGCCCTTCTTCTCCTGGCGGACACTGTGT  
CCCCGCGCGCTGGCGCTGCACCACATCTGGAAGCCAGGCGGGCAGGGCAGAGACCCCGGCTC  
CTGCGCCCTCCTAGCTCCAGAGAGCGTGGATCGCGGGCGGGGCTCACCGAGCGAGGTTACC  
TCTCTTGGAAATACTTAAACACTTTTTTCTCTCCACTGAAATCTCAAAAAACAGCCCATTTTAA  
CCAGAATAATTTAGTCTGACAACAGATTCTTCTCTGTTCAATGCTATCCCAGAGGGAGGAGCTG  
AAATCTGAACCTCTATGCTATGATTGGATCTTTCTTGCAAAAGAGAGGAAAAAAAAACCCCTCCAG  
CCAAAACGGGCTCAGTTTCGTAAAGGAGCCGGGTGACTTCAGAGGCGCCGGCCCGTCCGTCTGC  
CGATCCTAGCACGGCCCTGCCCGAGCTGGCCCGCCGCGATGCTGTAGGGACCGCCGTGTC  
CTCCCGCCGGACCGTT

Supplementary Table 6: Fold regulation of 50 EMT markers

|                 | Epithelial Markers |                    | Mesenchymal Markers |                    |
|-----------------|--------------------|--------------------|---------------------|--------------------|
|                 | Fold regulation    | Standard deviation | Fold regulation     | Standard deviation |
| <b>AHNAK</b>    |                    |                    | -2,39               | 1,77               |
| <b>BMP1</b>     |                    |                    | 0,833               | 1,64               |
| <b>CALD1*</b>   |                    |                    | 4,25                | 1,26               |
| <b>CAMK2N1</b>  |                    |                    | 0,276               | 1,42               |
| <b>CAV2</b>     | -1,70              | 0,94               |                     |                    |
| <b>CDH1*</b>    | 26,04              | 24,08              |                     |                    |
| <b>CDH2</b>     |                    |                    | 0,444               | 1,81               |
| <b>COL1A2</b>   |                    |                    | -0,287              | 1,72               |
| <b>COL3A1</b>   |                    |                    | 0,493               | 1,77               |
| <b>COL5A2</b>   |                    |                    | 2,27                | 1,61               |
| <b>DSP*</b>     | 284,49             | 100,34             |                     |                    |
| <b>FGFBP1*</b>  | 4,69               | 7,30               |                     |                    |
| <b>FN1*</b>     |                    |                    | 12,80               | 5,57               |
| <b>FOXC2</b>    |                    |                    | -2,22               | 1,19               |
| <b>GNG11</b>    |                    |                    | -1,49               | 0,36               |
| <b>GSC*</b>     |                    |                    | 159,94              | 104,81             |
| <b>IGFBP4</b>   |                    |                    | 2,39                | 1,22               |
| <b>IL1RN*</b>   | 5,05               | 6,15               |                     |                    |
| <b>ITGA5</b>    |                    |                    | -2,10               | 0,90               |
| <b>ITGAV</b>    |                    |                    | -1,11               | 2,15               |
| <b>KRT19</b>    | -3,38              | 3,47               |                     |                    |
| <b>MMP2*</b>    |                    |                    | -7,73               | 4,86               |
| <b>MMP3</b>     |                    |                    | -2,34               | 1,69               |
| <b>MMP9*</b>    |                    |                    | 6,82                | 4,55               |
| <b>MSN</b>      |                    |                    | -0,709              | 1,49               |
| <b>MST1R</b>    | 8,61               | 20,10              |                     |                    |
| <b>NUDT13</b>   | -1,85              | 0,25               |                     |                    |
| <b>OCLN*</b>    | 2,89               | 0,85               |                     |                    |
| <b>DES1</b>     | 0,290              | 1,30               |                     |                    |
| <b>RGS2*</b>    | -3,50              | 0,34               |                     |                    |
| <b>SERPINE1</b> |                    |                    | 2,11                | 1,62               |
| <b>SNAI1*</b>   |                    |                    | -2,38               | 0,77               |

|                 |       |      |        |       |
|-----------------|-------|------|--------|-------|
| <b>SNAI2*</b>   |       |      | -5,76  | 3,52  |
| <b>SNAI3</b>    |       |      | 3,30   | 5,87  |
| <b>SOX10</b>    |       |      | -2,12  | 0,80  |
| <b>SPARC</b>    |       |      | -1,58  | 0,69  |
| <b>SPP1*</b>    | 4,78  | 1,53 |        |       |
| <b>STAT3</b>    |       |      | 0,0381 | 1,77  |
| <b>TCF4</b>     |       |      | -0,578 | 1,86  |
| <b>TFPI2</b>    | 0,472 | 1,29 |        |       |
| <b>TIMP1</b>    |       |      | -2,15  | 1,10  |
| <b>TMEFF1</b>   |       |      | -0,587 | 1,71  |
| <b>TMEM132A</b> |       |      | 0,452  | 1,82  |
| <b>TSPAN13</b>  | -2,18 | 0,26 |        |       |
| <b>TWIST1*</b>  |       |      | -2,69  | 0,53  |
| <b>VCAN</b>     |       |      | 2,15   | 2,87  |
| <b>VIM</b>      |       |      | -2,08  | 0,79  |
| <b>VPS13A</b>   |       |      | 0,735  | 1,59  |
| <b>WNT5A*</b>   |       |      | 119,22 | 21,80 |
| <b>WNT5B*</b>   |       |      | -2,64  | 1,44  |

\* indicates significantly changed expression. Fold regulation between -1 and 1 are considered as no discernible tendency.

**Supplementary Table 7: Immunohistochemical expression of E-cadherin and Notch4 in melanocytic lesions.**

| Lesions (n)                                   | E-cadherin                      |            |             |            | Notch4    |           |            |             |
|-----------------------------------------------|---------------------------------|------------|-------------|------------|-----------|-----------|------------|-------------|
|                                               | -                               | +          | ++          | +++        | -         | +         | ++         | +++         |
| <b>Primary melanomas (30)</b>                 | 5<br>(17%)                      | 3<br>(10%) | 19<br>(63%) | 3<br>(10%) | 1<br>(3%) | 1<br>(3%) | 4<br>(14%) | 24<br>(80%) |
|                                               | Spearman's rho = 0,367 (p≤0,05) |            |             |            |           |           |            |             |
| <b>Cutaneous subcutaneous metastases (30)</b> | 13<br>(43%)                     | 6<br>(20%) | 9<br>(30%)  | 2<br>(7%)  |           |           | 8<br>(27%) | 22<br>(73%) |
|                                               | Spearman's rho = 0,366 (p≤0,05) |            |             |            |           |           |            |             |

**Supplementary References**

1. Rahman, K.W., et al., *Gene expression profiling revealed survivin as a target of 3,3'-diindolylmethane-induced cell growth inhibition and apoptosis in breast cancer cells*. *Cancer Res*, 2006. **66**(9): p. 4952-60.
2. Balint, K., et al., *Activation of Notch1 signaling is required for beta-catenin-mediated human primary melanoma progression*. *J Clin Invest*, 2005. **115**(11): p. 3166-76.
3. Chen, H., et al., *Involvement of S100A14 protein in cell invasion by affecting expression and function of matrix metalloproteinase (MMP)-2 via p53-dependent transcriptional regulation*. *J Biol Chem*, 2012. **287**(21): p. 17109-19.
